# Supplementary material
Source: PubMed Central journal article supplement (PMC3360918)
Supplement: supp_jcs.095067_JCS095067TableS1.pdf [file supp_jcs.095067_JCS095067TableS1.pdf]

**Genes with >2 fold down-regulation of mRNA expression**

| <i>Gene</i>                        | <i>Genbank ID</i> | <i>Fold Change</i> |
|------------------------------------|-------------------|--------------------|
| Interleukin 1 alpha                | 16175             | <b>-6.993</b>      |
| Tumor Necrosis Factor              | 21929             | <b>-6.173</b>      |
| Chemokine (C-X-C motif) ligand 5   | 20311             | <b>-6.046</b>      |
| Chemokine (C-X-C motif) receptor 4 | 12767             | <b>-5.486</b>      |
| Chemokine (C-C motif) ligand 2     | 20296             | <b>-4.072</b>      |
| Interleukin 22                     | 50929             | <b>-4.044</b>      |
| Interleukin 15                     | 16192             | <b>-3.377</b>      |
| Interleukin 19                     | 16198             | <b>-2.879</b>      |
| Interleukine 1 receptor, type I    | 16177             | <b>-2.507</b>      |
| Chemokine (C-C motif) ligand 1     | 20290             | <b>-2.421</b>      |
| Chemokine (C-C motif) ligand 7     | 20306             | <b>-2.167</b>      |
| Chemokine (C-X-C motif) ligand 12  | 20315             | <b>-2.036</b>      |
| Interleukin 1 receptor-like 1      | 17082             | <b>-2.008</b>      |

**Genes >2 fold up-regulation of mRNA expression**

| <i>Gene</i>                        | <i>Genbank ID</i> | <i>Fold Change</i> |
|------------------------------------|-------------------|--------------------|
| Colony stimulating factor 3        | 12985             | <b>3.372</b>       |
| Kit ligand                         | 17311             | <b>2.936</b>       |
| Chemokine (C-C motif) ligand 5     | 20304             | <b>2.664</b>       |
| Chemokine (C-X-C motif) receptor 5 | 12145             | <b>2.225</b>       |
| Interleukin 24                     | 93672             | <b>2.149</b>       |
| Interleukin 27                     | 246779            | <b>2.134</b>       |
| Interleukin 6 receptor, alpha      | 16194             | <b>2.033</b>       |
| Interleukin 17A                    | 16171             | <b>1.937</b>       |

**Genes with less than two-fold changes**

| <i>Gene</i>                           | <i>Genbank ID</i> | <i>Fold Change</i> |
|---------------------------------------|-------------------|--------------------|
| Interleukin 1 receptor antagonist     | 16181             | -1.939             |
| Colony stimulating factor 1           | 12977             | -1.926             |
| Interleukin 5                         | 16191             | -1.677             |
| Chemokine (C-X-C motif) ligand 10     | 15945             | -1.677             |
| Interleukin 28B                       | 338374            | -1.677             |
| Interleukin 2 receptor, beta chain    | 16185             | -1.631             |
| Interleukin 3                         | 16187             | -1.586             |
| Chemokine (C-X-C motif) receptor 2    | 12765             | -1.554             |
| Interleukin 10                        | 16153             | -1.522             |
| Chemokine (C-C motif) receptor 3      | 12771             | -1.449             |
| Interleukin 4                         | 16189             | -1.439             |
| Interleukin 23, alpha subunit p19     | 83430             | -1.439             |
| Interleukin 2                         | 16183             | -1.439             |
| Duffy blood group, chemokine receptor | 13349             | -1.420             |
| Platelet Factor 4                     | 56744             | -1.400             |
| Interleukin 2 receptor, alpha chain   | 16184             | -1.390             |
| Chemokine (C-X-C motif) receptor 3    | 12766             | -1.352             |
| Interleukin 6                         | 16193             | -1.352             |
| Chemokine (C-C motif) ligand 28       | 56838             | -1.297             |
| Chemokine (C-C motif) receptor 8      | 12776             | -1.262             |
| Chemokine (C-X3-C) receptor 1         | 13051             | -1.253             |
| Interleukin 12 receptor, beta 2       | 16162             | -1.227             |
| Kit oncogene                          | 16590             | -1.219             |
| Interferon alpha 1                    | 15962             | -1.202             |
| Chemokine (C-X3-C motif) ligand       | 20312             | -1.194             |
| Interleukin 11 receptor, alpha chain  | 16157             | -1.169             |
| Chemokine (C-C motif) receptor 4      | 12773             | -1.137             |
| Interleukin 17 receptor A,            | 16172             | -1.121             |
| Interleukin 9                         | 16198             | -1.121             |
| Interleukin 12b                       | 16160             | -1.083             |
| Chemokine (C-C motif) ligand 4        | 20303             | -1.061             |
| Transforming growth factor, beta 1    | 21803             | -1.025             |
| Interleukin 13 receptor, alpha 2      | 16165             | -1.025             |
| Interleukin 12a                       | 16159             | -1.004             |
| Chemokine (C-C motif) ligand 12       | 20293             | 1.009              |
| Interleukin 13                        | 16163             | 1.009              |
| Chemokine (C-C motif) receptor 5      | 12774             | 1.030              |
| Interleukin 27 receptor, alpha        | 50931             | 1.052              |
| Interferon gamma                      | 15978             | 1.059              |
| Interleukin 9 receptor                | 16199             | 1.067              |
| Interleukin 7 receptor                | 16197             | 1.082              |
| Chemokine (C-C motif) ligand 3        | 20302             | 1.104              |
| Interferon beta 1, fibroblast         | 15977             | 1.128              |
| Chemokine (C-X-C motif) ligand 2      | 20310             | 1.128              |
| Chemokine (C-C motif) receptor 1      | 12768             | 1.136              |
| Leukemia inhibitory factor receptor   | 16880             | 1.151              |
| Interleukin 21 receptor               | 60504             | 1.151              |
| Interleukin 4 receptor, alpha         | 16190             | 1.167              |
| Interleukin 5 receptor, alpha         | 16192             | 1.176              |
| Interleukin 18 receptor 1             | 16182             | 1.200              |
| Chemokine (C-C motif) receptor 7      | 12775             | 1.217              |
| Interleukin 11                        | 16156             | 1.217              |
| Interleukin 6 signal transducer       | 16195             | 1.251              |
| Leukemia inhibitory factor            | 16878             | 1.251              |
| Pro-platelet basic protein            | 57349             | 1.251              |
| Chemokine (C-X-C-motif) ligand 1      | 14825             | 1.260              |
| Chemokine (C-C motif) receptor 2      | 12772             | 1.278              |
| Interleukin 7                         | 16196             | 1.304              |
| Colony stimulating factor 2           | 12981             | 1.304              |
| Interleukin 23 receptor               | 209590            | 1.314              |
| Interleukin 2 receptor, gamma chain   | 16186             | 1.323              |
| Interleukin 18                        | 16173             | 1.323              |
| Interleukin 12 receptor, beta 1       | 16161             | 1.332              |
| Chemokine (C-X-C-motif) ligand 11     | 20292             | 1.360              |
| Interleukin 22 receptor, alpha 1      | 230828            | 1.398              |
| Interleukin 10 receptor, beta         | 16155             | 1.418              |
| Interleukin 17F                       | 257630            | 1.509              |
| Chemokine (C-X-C-motif) ligand 9      | 17329             | 1.541              |
| Interleukin 15 receptor, alpha chain  | 16169             | 1.551              |
| Interleukin 21                        | 60505             | 1.562              |
| Interleukin 25                        | 140806            | 1.617              |
