# Supplementary material
Source: PubMed Central journal article supplement (PMC3360918)

BIE

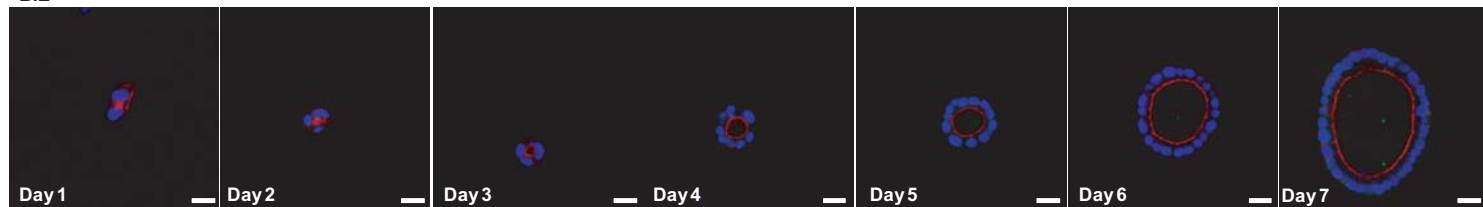

HC

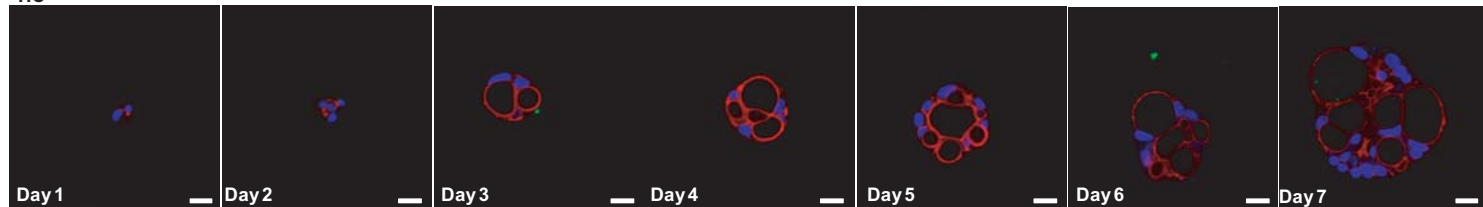

DEXA

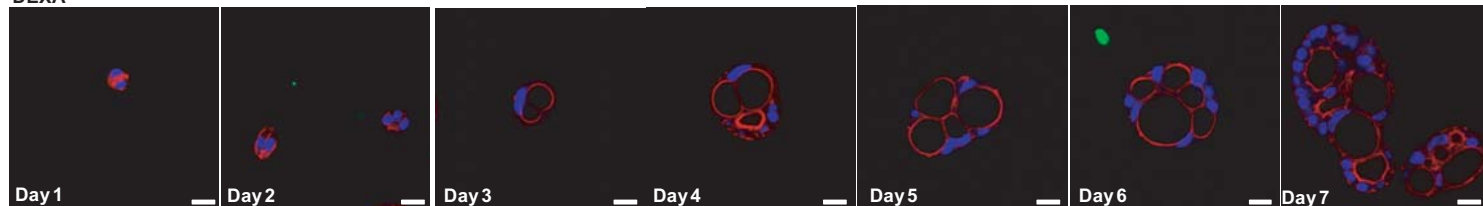

Supplement: supp_jcs.095067_JCS095067FigS1.pdf [file supp_jcs.095067_JCS095067FigS1.pdf]

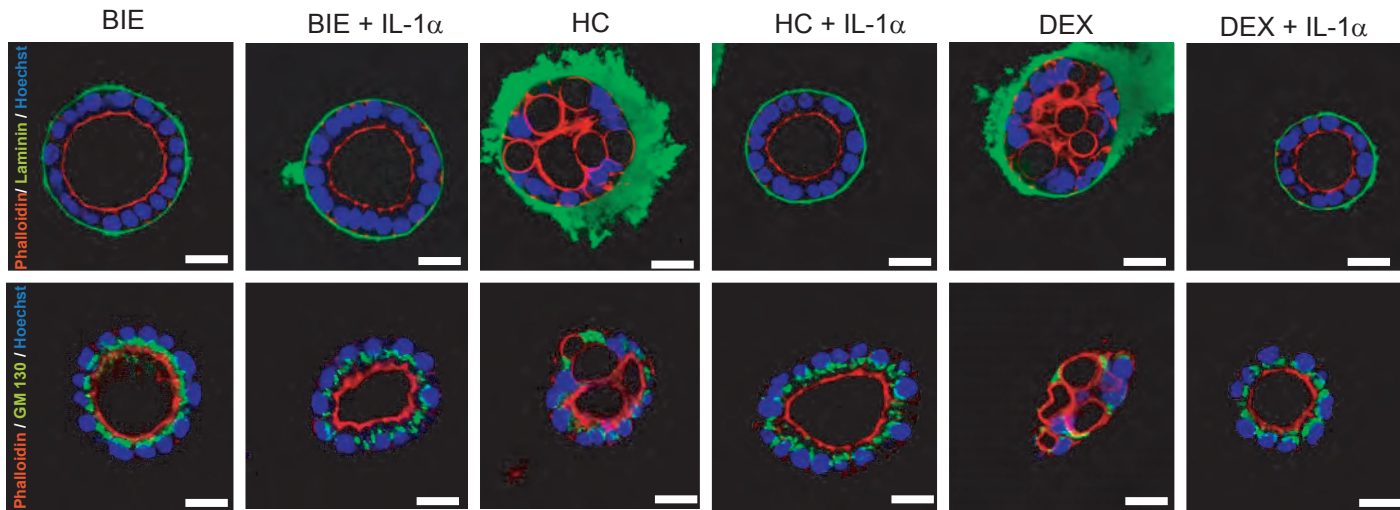

Supplement: supp_jcs.095067_JCS095067FigS2.pdf [file supp_jcs.095067_JCS095067FigS2.pdf]

A

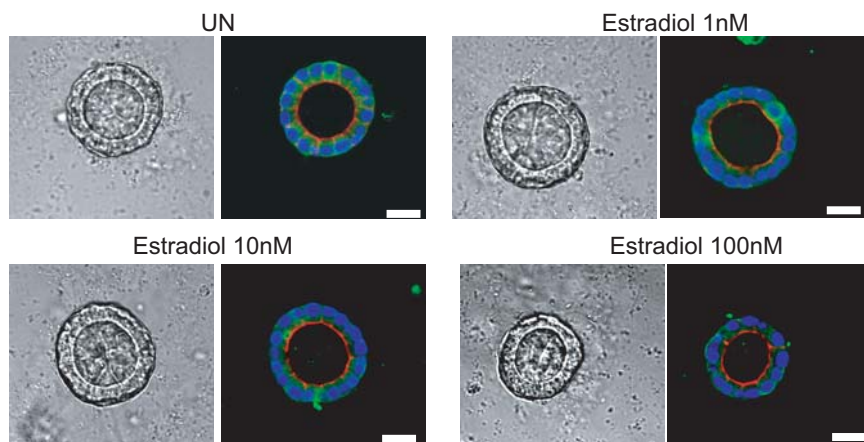

B

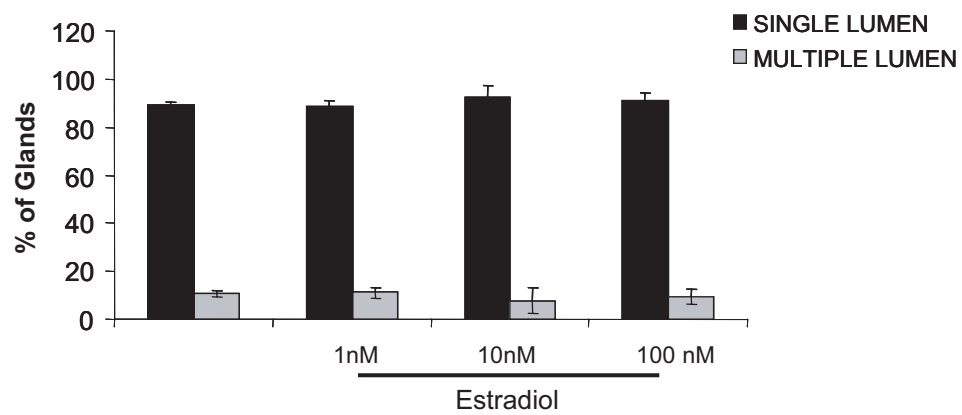

C

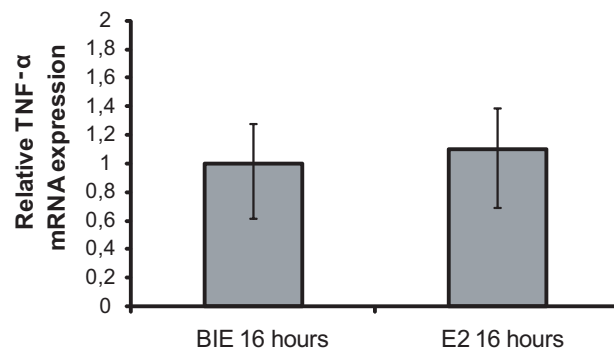

Supplement: supp_jcs.095067_JCS095067FigS3.pdf [file supp_jcs.095067_JCS095067FigS3.pdf]

A

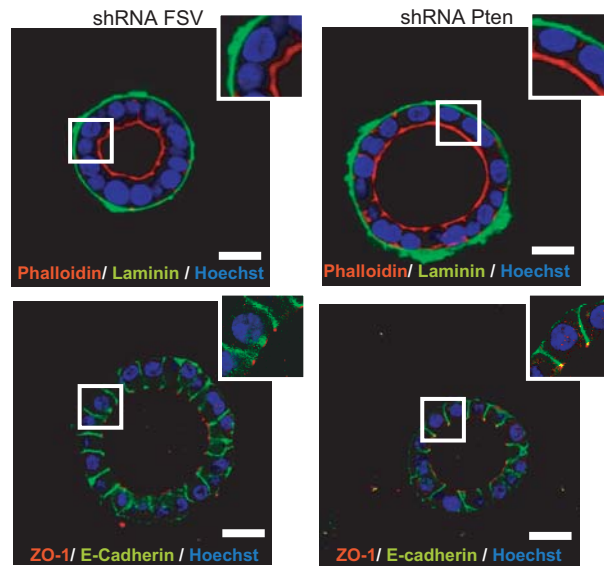

B

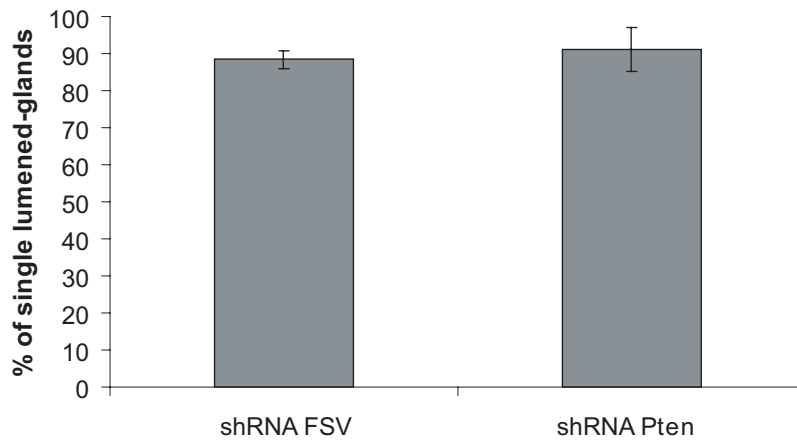

C

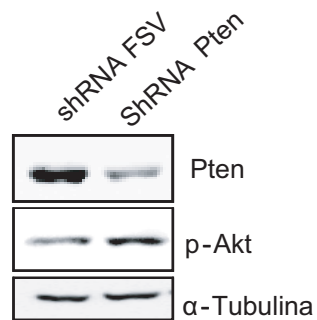

Supplement: supp_jcs.095067_JCS095067FigS4.pdf [file supp_jcs.095067_JCS095067FigS4.pdf]
